# Supplementary material
Source: Springer Nature journal article supplement (https://www.springermedizin.de/resource/supplementary/12884_2012_597_MOESM2_ESM.pdf/9457790)
Supplement: MOESM2 [file 9457790]

91 028 deliveries in 46  
referral hospitals

5 hospitals excluded  
( $n=3\ 112$  cases)

87 916 deliveries in 41  
referral hospitals

1 411 deliveries excluded:  
- Women living outside Senegal and  
Mali ( $n=70$ )  
- Spontaneous abortion<sup>s</sup> ( $n=90$ )  
- Date of delivery unknown ( $n=865$ )  
- Mode of delivery unknown ( $n=386$ )

86 505 deliveries (95%)  
included in the analysis
